# Supplementary material
Source: ML conference proceedings conference paper supplement (https://proceedings.neurips.cc/paper_files/paper/2009/hash/f79921bbae40a577928b76d2fc3edc2a-Abstract.html)
Supplement: Supplementary file [file f79921bbae40a577928b76d2fc3edc2a-Supplemental.zip]

---

# Learning from Multiple Partially Observed Views – an Application to Multilingual Text Categorization

## Supplementary material

---

**Massih R. Amini**  
Interactive Language Technologies Group  
National Research Council Canada  
Massih-Reza.Amini@cnrc-nrc.gc.ca

**Nicolas Usunier**  
Laboratoire d'Informatique de Paris 6  
Université Pierre et Marie Curie, France  
Nicolas.Usunier@lip6.fr

**Cyril Goutte**  
Interactive Language Technologies Group  
National Research Council Canada  
Cyril.Goutte@cnrc-nrc.gc.ca

### Appendix: Proof of Theorem 1

For clarity, we recall the theorem:

**Theorem 1** *Let  $\mathcal{D}$  be a distribution over  $\mathcal{X}$ , satisfying  $\mathbb{P}_{(\mathbf{x},y) \sim \mathcal{D}}(|\{v : x^v \neq \perp\}| \neq 1) = 0$ . Let  $\mathcal{S} = ((\mathbf{x}_i, y_i))_{i=1}^m$  be a dataset of  $m$  examples drawn i.i.d. according to  $\mathcal{D}$ . Let  $e$  be the 0/1 loss, and let  $(\mathcal{H}_v)_{v=1}^V$  be the view-specific deterministic classifier sets. For each view  $v$ , denote  $e \circ \mathcal{H}_v \stackrel{\text{def}}{=} \{(x^v, y) \mapsto e(h, (x^v, y)) | h \in \mathcal{H}_v\}$ , and denote, for any sequence  $\mathcal{S}^v \in (\mathcal{X}_v \times \mathcal{Y})^{m_v}$  of size  $m_v$ ,  $\hat{\mathcal{R}}_{m_v}(e \circ \mathcal{H}_v, \mathcal{S}^v)$  the empirical Rademacher complexity of  $e \circ \mathcal{H}_v$  on  $\mathcal{S}^v$ . Then, we have:*

**Baseline setting** *for all  $1 > \delta > 0$ , with probability at least  $1 - \delta$  over  $\mathcal{S}$ :*

$$\epsilon(c_{h_1, \dots, h_V}^b) \leq \inf_{h'_v \in \mathcal{H}_v} [\epsilon(c_{h'_1, \dots, h'_V}^b)] + 2 \sum_{v=1}^V \frac{m_v}{m} \hat{\mathcal{R}}_{m_v}(e \circ \mathcal{H}_v, \mathcal{S}^v) + 6\sqrt{\frac{\ln(2/\delta)}{2m}}$$

*where, for all  $v$ ,  $\mathcal{S}^v \stackrel{\text{def}}{=} \{(x_i^v, y_i) | i = 1..m \text{ and } x_i^v \neq \perp\}$ ,  $m_v = |\mathcal{S}^v|$  and  $h_v \in \mathcal{H}_v$  is the empirical risk minimizer on  $\mathcal{S}^v$ .*

**Multi-view Gibbs classification setting** *for all  $1 > \delta > 0$ , with probability at least  $1 - \delta$  over  $\mathcal{S}$ :*

$$\epsilon(c_{h_1, \dots, h_V}^{mg}) \leq \inf_{h'_v \in \mathcal{H}_v} [\epsilon(c_{h'_1, \dots, h'_V}^b)] + \frac{2}{V} \sum_{v=1}^V \hat{\mathcal{R}}_{m_v}(e \circ \mathcal{H}_v, \mathcal{S}^v) + 6\sqrt{\frac{\ln(2/\delta)}{2m}} + \eta$$

*where, for all  $v$ ,  $\mathcal{S}^v \stackrel{\text{def}}{=} \{(x_i^v, y_i) | i = 1..m\}$ , and  $h_v \in \mathcal{H}_v$  is the empirical risk minimizer on  $\mathcal{S}^v$ .*

$$\eta = \inf_{h'_v \in \mathcal{H}_v} [\epsilon(c_{h'_1, \dots, h'_V}^{mg})] - \inf_{h'_v \in \mathcal{H}_v} [\epsilon(c_{h'_1, \dots, h'_V}^b)] \quad (1)$$

### Proof for the Baseline Setting

We start by proving the baseline setting. Fix a dataset  $\mathcal{S}$ , and let  $h_1, \dots, h_V$  be the empirical risk minimizers on each view, trained with the examples for which the corresponding view is observed. That is:

$$\forall v, h_v \in \arg \min_{h \in \mathcal{H}_v} \sum_{(\mathbf{x}, y) \in \mathcal{S} : x^v \neq \perp} e(h, (x^v, y)) \quad (2)$$

Considering that  $c_{h_1, \dots, h_V}^b$  classifies an instance according to the classifier of the observed view, we can notice that  $c_{h_1, \dots, h_V}^b$  is exactly the empirical risk minimizer over  $\mathcal{S}$  for the set of classifiers  $\mathcal{C}^b = \{c_{h'_1, \dots, h'_V}^b | \forall v, h'_v \in \mathcal{H}_v\}$  (recall that exactly one view is observed for each example) with  $h_v, v \in \mathcal{V}$  defined as in Equation (2), we have:

$$c_{h_1, \dots, h_V}^b \in \arg \min_{c_{h'_1, \dots, h'_V}^b \in \mathcal{C}^b} \sum_{(\mathbf{x}, y) \in \mathcal{S}} e(c_{h'_1, \dots, h'_V}^b, (\mathbf{x}^v, y))$$

We then start by using the well-known inequality that bounds the generalization error between the empirical risk minimizer and the error of the best-in class (see e.g. lemma 1.1 of [2]):

$$\epsilon(c_{h_1, \dots, h_V}^b) - \inf_{c_{h'_1, \dots, h'_V}^b \in \mathcal{C}^b} [\epsilon(c_{h'_1, \dots, h'_V}^b)] \leq 2 \sup_{c_{h'_1, \dots, h'_V}^b \in \mathcal{C}^b} \left| \hat{\epsilon}(c_{h'_1, \dots, h'_V}^b, \mathcal{S}) - \epsilon(c_{h'_1, \dots, h'_V}^b) \right| \quad (3)$$

where  $\hat{\epsilon}(c_{h'_1, \dots, h'_V}^b, \mathcal{S}) = \frac{1}{|\mathcal{S}|} \sum_{(\mathbf{x}, y) \in \mathcal{S}} e(c_{h'_1, \dots, h'_V}^b, (\mathbf{x}, y))$  is the empirical risk, on the set  $\mathcal{S}$ , of  $c_{h'_1, \dots, h'_V}^b$ .

Since  $e$  is the 0/1 loss, we have  $0 \leq e(c_{h'_1, \dots, h'_V}^b, (\mathbf{x}, y)) \leq 1$  for any  $(\mathbf{x}, y)$ . We can thus use the standard Rademacher complexity analysis to obtain a data-dependent bound on the right-hand term of Equation (3), so we can apply McDiarmid's theorem [4] to the function  $\mathcal{S} \mapsto \sup_{c_{h'_1, \dots, h'_V}^b \in \mathcal{C}^b} \left| \hat{\epsilon}(c_{h'_1, \dots, h'_V}^b, \mathcal{S}) - \epsilon(c_{h'_1, \dots, h'_V}^b) \right|$ , which can not change by more than  $1/m$  when a pair  $(\mathbf{x}, y)$  changes. We then have, with probability at least  $1 - \delta/2$ :

$$\begin{aligned} \sup_{c_{h'_1, \dots, h'_V}^b \in \mathcal{C}^b} \left| \hat{\epsilon}(c_{h'_1, \dots, h'_V}^b, \mathcal{S}) - \epsilon(c_{h'_1, \dots, h'_V}^b) \right| &\leq \mathbb{E}_{\mathcal{S}' \sim \mathcal{D}^m} \sup_{c_{h'_1, \dots, h'_V}^b \in \mathcal{C}^b} \left| \hat{\epsilon}(c_{h'_1, \dots, h'_V}^b, \mathcal{S}') - \epsilon(c_{h'_1, \dots, h'_V}^b) \right| \\ &\quad + \sqrt{\frac{\ln(2/\delta)}{2m}} \end{aligned} \quad (4)$$

where  $m = |\mathcal{S}|$ .

We will now use the classical definition of the Rademacher complexity (see e.g. [1]) for some class of function  $\mathcal{F}$  defined on the input space  $\mathcal{X} \times \mathcal{Y}$ :

$$\mathcal{R}_m(\mathcal{F}) \stackrel{\text{def}}{=} \mathbb{E}_{\mathcal{S}' \sim \mathcal{D}^m} \hat{\mathcal{R}}_m(\mathcal{F}, \mathcal{S}')$$

where  $\hat{\mathcal{R}}_m(\mathcal{F}, \mathcal{S}')$  is the empirical Rademacher complexity of  $\mathcal{F}$  on the dataset  $\mathcal{S}'$ , defined as:

$$\hat{\mathcal{R}}_m(\mathcal{F}, \mathcal{S}') \stackrel{\text{def}}{=} \mathbb{E}_{\sigma_1, \dots, \sigma_m} \sup_{f \in \mathcal{F}} \left| \frac{2}{m} \sum_{i=1}^m \sigma_i f((\mathbf{x}'_i, y'_i)) \right|$$

where  $\sigma_i$  are independent random variables such that  $\mathbb{P}(\sigma_i = 1) = \mathbb{P}(\sigma_i = -1) = 1/2$ . With standard arguments of the Rademacher complexity analysis, we have, with probability at least  $1 - \delta/2$ :

$$\mathbb{E}_{\mathcal{S}' \sim \mathcal{D}^m} \sup_{c_{h'_1, \dots, h'_V}^b \in \mathcal{C}^b} \left| \hat{\epsilon}(c_{h'_1, \dots, h'_V}^b, \mathcal{S}') - \epsilon(c_{h'_1, \dots, h'_V}^b) \right| \leq \hat{\mathcal{R}}_m(e \circ \mathcal{C}^b, \mathcal{S}) + \sqrt{\frac{2 \ln(2/\delta)}{m}} \quad (5)$$

where  $e \circ \mathcal{C}^b = \{(\mathbf{x}, y) \mapsto e(c_{h'_1, \dots, h'_V}^b, (\mathbf{x}, y)) | c_{h'_1, \dots, h'_V}^b \in \mathcal{C}^b\}$ . Plugging Equation (5) into Equations (4) and (3), we obtain, with probability at least  $1 - \delta$ :

$$\epsilon(c_{h_1, \dots, h_V}^b) \leq \inf_{c_{h'_1, \dots, h'_V}^b \in \mathcal{C}^b} [\epsilon(c_{h'_1, \dots, h'_V}^b)] + 2\hat{\mathcal{R}}_m(e \circ \mathcal{C}^b, \mathcal{S}) + 6\sqrt{\frac{\ln(2/\delta)}{2m}} \quad (6)$$

The final step consists in re-writing the empirical Rademacher complexity  $\hat{\mathcal{R}}_m(e \circ \mathcal{C}^b, \mathcal{S})$  depending on the Rademacher complexity of the view-specific classifier sets. Given the dataset  $\mathcal{S}$ , we define,

for each view  $v$ , the partial dataset  $\mathcal{S}^v \stackrel{\text{def}}{=} \{(x_i^v, y_i) | i = 1..m \text{ and } x_i^v \neq \perp\}$ . We use a specific index notation for the examples in  $\mathcal{S}^v$ :  $\mathcal{S}^v = \{(x_{i_k}^v, y_{i_k}^v), k = 1..m_v\}$

Starting from the definition, we have:

$$\begin{aligned} \hat{\mathcal{R}}_m(e \circ \mathcal{C}^b, \mathcal{S}) &= \mathbb{E}_{\sigma_1, \dots, \sigma_m} \sup_{c_{h'_1, \dots, h'_V}^b \in \mathcal{C}^b} \left| \frac{2}{m} \sum_{i=1}^m \sigma_i e(c_{h'_1, \dots, h'_V}^b, (\mathbf{x}_i, y_i)) \right| \\ &= \mathbb{E}_{\sigma_1, \dots, \sigma_m} \sup_{c_{h'_1, \dots, h'_V}^b \in \mathcal{C}^b} \left| \frac{2}{m} \sum_{v=1}^V \sum_{i: x_i^v \neq \perp} \sigma_i e(h'_v, (x_i^v, y_i)) \right| \\ &\leq \sum_{v=1}^V \frac{m_v}{m} \mathbb{E}_{\sigma_1, \dots, \sigma_{m_v}} \sup_{h'_v \in \mathcal{H}_v} \left| \frac{2}{m_v} \sum_{k=1}^{m_v} \sigma_k e(h'_v, (x_{i_k}^v, y_{i_k}^v)) \right| \\ &= \sum_{v=1}^V \frac{m_v}{m} \hat{\mathcal{R}}_{m_v}(e \circ \mathcal{H}_v, \mathcal{S}^v) \end{aligned}$$

Together with Equation (6) gives the desired result.

### Proof for the Multi-view Gibbs Classification Setting

The proof follows the same steps, replacing  $\mathcal{C}^b$  by  $\mathcal{C}^{mg} \stackrel{\text{def}}{=} \{c_{h'_1, \dots, h'_V}^{mg} | \forall v, h'_v \in \mathcal{H}_v\}$ . Only the last step (the calculation of the empirical Rademacher complexity) has to be modified. Remind that the true and empirical risks of the multi-view Gibbs classifier are the average of empirical and true risks of the view-specific classifiers, as the multi-view Gibbs classifier is supposed to be drawn from a uniform posterior distribution [3].

Re-starting from the definition of the empirical Rademacher complexity, we have:

$$\begin{aligned} \hat{\mathcal{R}}_m(e \circ \mathcal{C}^{mg}, \mathcal{S}) &= \mathbb{E}_{\sigma_1, \dots, \sigma_m} \sup_{c_{h'_1, \dots, h'_V}^{mg} \in \mathcal{C}^b} \left| \frac{2}{m} \sum_{i=1}^m \sigma_i e(c_{h'_1, \dots, h'_V}^{mg}, (\mathbf{x}_i, y_i)) \right| \\ &= \mathbb{E}_{\sigma_1, \dots, \sigma_m} \sup_{c_{h'_1, \dots, h'_V}^{mg} \in \mathcal{C}^b} \left| \frac{2}{mV} \sum_{v=1}^V \sum_{i=1}^m \sigma_i e(h'_v, (x_i^v, y_i)) \right| \\ &\leq \frac{1}{V} \sum_{v=1}^V \mathbb{E}_{\sigma_1, \dots, \sigma_m} \sup_{h'_v \in \mathcal{H}_v} \left| \frac{2}{m} \sum_{i=1}^m \sigma_i e(h'_v, (x_i^v, y_i)) \right| \\ &= \frac{1}{V} \sum_{v=1}^V \hat{\mathcal{R}}_m(e \circ \mathcal{H}_v, \underline{\mathcal{S}}^v) \end{aligned}$$

where  $\underline{\mathcal{S}}^v \stackrel{\text{def}}{=} \{(x_i^v, y_i) | i = 1..m\}$

### References

- [1] P. L. Bartlett and S. Mendelson. Rademacher and gaussian complexities: risk bounds and structural results. *Journal of Machine Learning Research*, 3:463–482, 2003.
- [2] G. Lugosi. Pattern classification and learning theory. In L. Györfi, editor, *Principles of Non-parametric Learning*, pages 1–56. Springer, 2002.
- [3] D. A. McAllester. Pac-bayesian stochastic model selection. *Machine Learning*, 51(1):5–21, 2003.
- [4] C. McDiarmid. On the method of bounded differences. In *Surveys in Combinatorics 1989*, pages 148–188. London Mathematical Society Lecture Notes, 1989.
